# Supplementary material for: Effect of 3D Spheroid Culturing on NF-κB Signaling Pathway and Neurogenic Potential in Human Amniotic Fluid Stem Cells
Source: MDPI journal article supplement (doi:10.3390/ijms24043584), 2023-02-10
Supplement: s1 [file s1]

**Table S1.** The 25 most relevant pathways from Reactome database sorted by p-value.

| Upregulated in 3D secretome |                                                                                                                             |         | Downregulated in 3D secretome                                                                                               |          |
|-----------------------------|-----------------------------------------------------------------------------------------------------------------------------|---------|-----------------------------------------------------------------------------------------------------------------------------|----------|
| No.                         | Pathway name                                                                                                                | p-value | Pathway name                                                                                                                | p-value  |
| 1                           | Retinoid metabolism and transport                                                                                           | 2.73E-4 | Extracellular matrix organization                                                                                           | 5.29e-13 |
| 2                           | Metabolism of fat-soluble vitamins                                                                                          | 3.52E-4 | Degradation of the extracellular matrix                                                                                     | 3.66e-09 |
| 3                           | Plasma lipoprotein assembly                                                                                                 | 1.37E-3 | Syndecan interactions                                                                                                       | 1.31e-08 |
| 4                           | Retinoid metabolism disease events                                                                                          | 2.84E-3 | Regulation of Insulin-like Growth Factor (IGF) transport and uptake by Insulin-like Growth Factor Binding Proteins (IGFBPs) | 4.25e-08 |
| 5                           | Visual phototransduction                                                                                                    | 2.88E-3 | ECM proteoglycans                                                                                                           | 6.19e-08 |
| 6                           | Post-translational protein phosphorylation                                                                                  | 3.48E-3 | Post-translational protein phosphorylation                                                                                  | 4.54e-07 |
| 7                           | Regulation of Insulin-like Growth Factor (IGF) transport and uptake by Insulin-like Growth Factor Binding Proteins (IGFBPs) | 5.24E-3 | Non-integrin membrane-ECM interactions                                                                                      | 6.11e-07 |
| 8                           | Formation of Fibrin Clot (Clotting Cascade)                                                                                 | 5.57E-3 | Assembly of collagen fibrils and other multimeric structures                                                                | 7.19e-07 |
| 9                           | Defective SLC40A1 causes hemochromatosis 4 (HFE4) (macrophages)                                                             | 5.67E-3 | Collagen degradation                                                                                                        | 9.09e-07 |
| 10                          | Defective CP causes aceruloplasminemia (ACERULOP)                                                                           | 5.67E-3 | Platelet degranulation                                                                                                      | 1.28e-06 |
| 11                          | Regulation of Complement cascade                                                                                            | 6.63E-3 | MET activates PTK2 signaling                                                                                                | 1.52e-06 |
| 12                          | Complement cascade                                                                                                          | 8.21E-3 | Response to elevated platelet cytosolic Ca <sup>2+</sup>                                                                    | 1.59e-06 |
| 13                          | Alternative complement activation                                                                                           | 1.41E-2 | Hemostasis                                                                                                                  | 2.17e-06 |
| 14                          | Loss of proteins required for interphase microtubule organization from the centrosome                                       | 1.65E-2 | Activation of Matrix Metalloproteinases                                                                                     | 2.21e-06 |
| 15                          | Loss of Nlp from mitotic centrosomes                                                                                        | 1.65E-2 | Collagen formation                                                                                                          | 4.75e-06 |
| 16                          | PTK6 promotes HIF1A stabilization                                                                                           | 1.69E-2 | MET promotes cell motility                                                                                                  | 5.18e-06 |
| 17                          | Metabolism of vitamins and cofactors                                                                                        | 1.71E-2 | Platelet activation, signaling and aggregation                                                                              | 6.61e-06 |
| 18                          | AURKA Activation by TPX2                                                                                                    | 1.79E-2 | Signaling by MET                                                                                                            | 6.97e-05 |
| 19                          | Plasma lipoprotein assembly, remodeling, and clearance                                                                      | 1.79E-2 | Integrin cell surface interactions                                                                                          | 8.80e-05 |
| 20                          | Cilium Assembly                                                                                                             | 1.95E-2 | Interleukin-4 and Interleukin-13 signaling                                                                                  | 2.43e-04 |
| 21                          | Activation of C3 and C5                                                                                                     | 1.97E-2 | Collagen chain trimerization                                                                                                | 2.49e-04 |
| 22                          | Centrosome maturation                                                                                                       | 2.23E-2 | Signaling by Receptor Tyrosine Kinases                                                                                      | 5.57e-04 |
| 23                          | Recruitment of mitotic centrosome proteins and complexes                                                                    | 2.23E-2 | Collagen biosynthesis and modifying enzymes                                                                                 | 8.43e-04 |
| 24                          | Transport of fatty acids                                                                                                    | 2.25E-2 | Crosslinking of collagen fibrils                                                                                            | 0.001    |
| 25                          | HDL assembly                                                                                                                | 2.25E-2 | Cell-extracellular matrix interactions                                                                                      | 0.001    |
