# Supplementary material for: Effect of 3D Spheroid Culturing on NF-κB Signaling Pathway and Neurogenic Potential in Human Amniotic Fluid Stem Cells
Source: MDPI journal article supplement (doi:10.3390/ijms24043584), 2023-02-10
Supplement: s1 [file s1]

**Table S2.** Antibodies used for flow cytometry analysis.

| <b>Antibody</b>       | <b>Fluorophore</b> | <b>Host/Isotype</b> | <b>Manufacturer</b>                                       |
|-----------------------|--------------------|---------------------|-----------------------------------------------------------|
| anti-CD31             | Alexa Fluor® 488   | Mouse/IgG1, κ       | Biolegend, San Diego,<br>California, USA                  |
| anti-CD34             | FITC               | Mouse/IgG2a, κ      |                                                           |
| anti-CD44             | APC                | Mouse/IgG1, κ       |                                                           |
| anti-CD56             | APC                | Mouse/IgG1, κ       |                                                           |
| anti-CD117            | APC                | Mouse/IgG1, κ       |                                                           |
| anti-CD146            | APC                | Mouse/IgG1, κ       |                                                           |
| anti-CD166            | PE                 | Mouse/IgG1, κ       |                                                           |
| anti-SSEA4            | APC                | Mouse/IgG3, κ       |                                                           |
| anti-HLA-ABC          | Alexa Fluor® 488   | Mouse/IgG2a, κ      |                                                           |
| anti-HLA-DR           | Alexa Fluor® 488   | Mouse/IgG2a, κ      | Exbio, Vestec, Czech Republic                             |
| anti-CD73             | FITC               | Mouse/IgG1, κ       |                                                           |
| anti-CD90             | APC                | Mouse/IgG1, κ       |                                                           |
| anti-CD105            | APC                | Mouse/IgG1, κ       |                                                           |
| anti-LIN28a           | -                  | Mouse/IgG2b         | Novus Biologicals, Abingdon,<br>UK                        |
| anti-MSI1             | -                  | Rabbit/IgG          |                                                           |
| anti-Nestin           | -                  | Mouse/IgG1, κ       |                                                           |
| Secondary Anti-mouse  | Alexa Fluor® 488   | Goat / IgG          | Invitrogen, Thermo Fisher<br>Scientific, Waltham, MA, USA |
| Secondary Anti-rabbit | Alexa Fluor® 488   | Goat / IgG          |                                                           |
