# Supplementary material for: Effect of 3D Spheroid Culturing on NF-κB Signaling Pathway and Neurogenic Potential in Human Amniotic Fluid Stem Cells
Source: MDPI journal article supplement (doi:10.3390/ijms24043584), 2023-02-10
Supplement: s1 [file s1]

**Table S3.** List of primers sequences for gene expression analysis.

| <b>Name</b>    | <b>Forward primer sequence (5'-3')</b> | <b>Reverse primer sequence (5'-3')</b> |
|----------------|----------------------------------------|----------------------------------------|
| <i>GAPDH</i>   | AGTCCCTGCCACACTCAG                     | TACTTTATTGATGGTACATGACAAGG             |
| <i>RPL13A</i>  | GTTGATGCCCTTCACAGCGTA                  | AGATGGCGGAGGTGCAG                      |
| <i>SOX2</i>    | TGGACAGTTACGCGCACAT                    | CGAGTAGGACATGCTGTAGGT                  |
| <i>OCT4</i>    | CGAGAAGGATGTGGTCCGAG                   | CAGAGGAAAGGACACTGGTC                   |
| <i>NANOG</i>   | AGATGCCTCACACGGAGACT                   | GTTTGCCTTTGGGACTGGTG                   |
| <i>LIN28A</i>  | TTGTCTTCTACCCTGCCCTCT                  | GAACAAGGGATGGAGGGTTTT                  |
| <i>MSI1</i>    | TGAGCAGTTTGGGAAGGTG                    | TCACACACTTTCTCCACGATG                  |
| <i>MSI2</i>    | ATCCCACTACGAAACGCTCC                   | GGGGTCAATCGTCTTGGAATC                  |
| <i>NOTCH1</i>  | GGTGAGACCTGCCTGAATG                    | GTTGGGGTCCTGGCATC                      |
| <i>MYC</i>     | AATGAAAAGGCCCCCAAGGTAGTTATCC           | GTCGTTTCCGCAACAAGTCCTCTTC              |
| <i>TP53</i>    | TAACAGTTCCTGCATGGGCGGC                 | AGGACAGGCACAAACACGCACC                 |
| <i>BAK1</i>    | TCATCGGGGACGACATCAAC                   | CAAACAGGCTGGTGGCAATC                   |
| <i>BAX</i>     | TGCCTCAGGATGCGTCCACCAA                 | CCCCAGTTGAAGTTGCCGTCAG                 |
| <i>MCL1</i>    | GTGCCTTTGTGGCTAAACACT                  | AGTCCCGTTTTGTCTTACGA                   |
| <i>HIF1A</i>   | CCAACAGTAACCAACCTCAG                   | TCCTGTGGTGACTTGTCTT                    |
| <i>MAP2</i>    | CCAATGGATTCCCATACAGG                   | TCCTTGACAGACACCTCCTCT                  |
| <i>NCAM1</i>   | TGTCCGATTCATAGTCTGTCC                  | CTCACAGCGATAAGTGCCCTC                  |
| <i>NSE</i>     | CCCACTGATCCTTCCCGATACAT                | CCGATCTGGTTGACCTTGAGCA                 |
| <i>NES</i>     | CTGCTACCCTTGAGACACCTG                  | GGGCTCTGATCTCTGCATCTAC                 |
| <i>TUBB3</i>   | CTCAGGGGCCTTTGGACATC                   | CAGGCAGTCGCAGTTTTTAC                   |
| <i>NTRK1</i>   | CCCCATCCCTGACACTAACA                   | GCACAAGGAGCAGCGTAGAA                   |
| <i>NTRK2</i>   | ACCCGAAACAAACTGACGAGT                  | AGCATGTAAATGGATTGCCCA                  |
| <i>GFAP</i>    | GGCAAAAGCACCAAAGACGG                   | GGCGGCGTTCCATTTACAAT                   |
| <i>NGF</i>     | TGTGGGTTGGGGATAAGACCA                  | GCTGTCAACGGGATTGGGT                    |
| <i>CNTF</i>    | GAAGATTTCGTTGAGACCTGACTG               | AAGGTTCTCTTGAGTCGCTC                   |
| <i>ALDH1L1</i> | GCCTGGCTTCTGGTGTCTTC                   | GCCACGTCGGTCTTGTTGTA                   |
| <i>GNDF</i>    | ACCTGGAGTTAATGTCCAACC                  | GGCATATTTGAGTCACTGCT                   |
| <i>NEUROD1</i> | ATGACCAAATCGTACAGCGAG                  | GTTCATGGCTTCGAGGTCGT                   |
| <i>VEGFA</i>   | AGGGCAGAATCATCACGAAGT                  | AGGGTCTCGATTGGATGGCA                   |
| <i>VIM</i>     | TCTCTGAGGCTGCCAACCG                    | CGAAGGTGACGAGCCATTTC                   |
| <i>NFKB1</i>   | GAAGCACGAATGACAGAGGC                   | GCTTGGCGGATTAGCTCTTTT                  |
| <i>NFKB2</i>   | ATGGAGAGTTGCTACAACCCA                  | CTGTTCCACGATCACCAGGTA                  |
| <i>RELA</i>    | ATGTGGAGATCATTGAGCAGC                  | CCTGGTCCTGTGTAGCCATT                   |
| <i>REL</i>     | AAAGACTGCAGAGACGGCTA                   | CTCACCACATTGAGGTCACA                   |
| <i>TNFR1</i>   | TCACCGCTTCAGAAAACCACC                  | GGTCCACTGTGCAAGAAGAGA                  |
| <i>TNFR2</i>   | TTCATCCACGGATATTTGCAGG                 | GCTGGGGTAAGTGTACTGCC                   |
