# Supplementary material for: Effect of 3D Spheroid Culturing on NF-κB Signaling Pathway and Neurogenic Potential in Human Amniotic Fluid Stem Cells
Source: MDPI journal article supplement (doi:10.3390/ijms24043584), 2023-02-10
Supplement: s1 [file s1]

### Immunofluorescent analysis of MYC expression

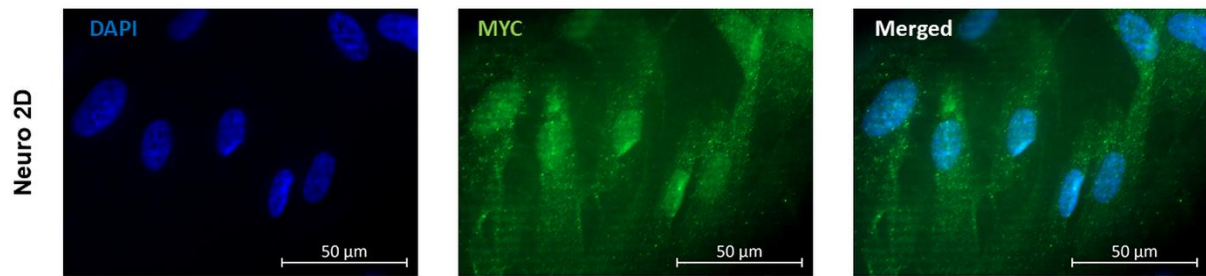

**Figure S1.** MYC expression profile in hAFSCs induced to neural differentiation, when cells were grown in 2D culture. Representative images of neuro-induced 2D (Neuro 2D), showing positive cells for MYC (green). Nuclei were counterstained with DAPI (blue); scale bar = 50 µm.
