# Supplementary material for: Effect of 3D Spheroid Culturing on NF-κB Signaling Pathway and Neurogenic Potential in Human Amniotic Fluid Stem Cells
Source: Int J Mol Sci. 2023 Feb 10;24(4):3584. doi: 10.3390/ijms24043584 (PMC9963588; doi:10.3390/ijms24043584)
Supplement: Supplementary file 1 [file ijms-24-03584-s001.zip]

Archive with 5 entries (5 files):
- Figure S1.pdf
- MS raw data S1.xlsx
- Table S1.pdf
- Table S2.pdf
- Table S3.pdf
