# Supplementary material for: Effect of 3D Spheroid Culturing on NF-κB Signaling Pathway and Neurogenic Potential in Human Amniotic Fluid Stem Cells
Source: Int J Mol Sci. 2023 Feb 10;24(4):3584. doi: 10.3390/ijms24043584 (PMC9963588; doi:10.3390/ijms24043584)
Supplement: Supplementary file 1 [file ijms-24-03584-s001.zip › MS raw data S1.xlsx]

## Sheet: Sheet1
	Effect of 3D spheroid culturing on NF-κB signaling pathway and neurogenic potential in human amniotic fluid stem cells
	Giedrė Valiulienė1‡, Aistė Zentelytė1‡, Elizabet Beržanskytė1, Rūta Navakauskienė1
	1Department of Molecular Cell Biology, Institute of Biochemistry, Life Sciences Center, Vilnius University, Saulėtekio av. 7, LT-01257 Vilnius, Lithuania.
	‡Shared first authorship
description	IEP	mw	max score	accession	reported peptides	sequence coverage	FDR level	entry	AF108 2D Ctrl	AF99 2D Ctrl	AF108 3D Ctrl	AF99 3D Ctrl
Albumin OS=Homo sapiens OX=9606 GN=ALB PE=1 SV=2	5.86	71362.7	58835.1	P02768	54	94.58	0	ALBU_HUMAN	1111692	882105	1.00231e+06	1.07423e+06
Hemoglobin subunit beta OS=Homo sapiens OX=9606 GN=HBB PE=1 SV=2	6.88	16112.5	46541.3	P68871	11	95.24	0	HBB_HUMAN	192005	186283	261018	197138		AF99 and AF108 - untreated (control) AFSCs cultivated in 2D or 3D cultures
Transthyretin OS=Homo sapiens OX=9606 GN=TTR PE=1 SV=1	5.4	16001.1	42814.1	P02766	10	73.47	0	TTHY_HUMAN	268031	346289	324517	249590
Haptoglobin OS=Homo sapiens OX=9606 GN=HP PE=1 SV=1	6.12	45889.7	38586.9	P00738	25	70.69	0	HPT_HUMAN	703660	736911	755463	819450
Apolipoprotein A-II OS=Homo sapiens OX=9606 GN=APOA2 PE=1 SV=1	6.64	11289.1	37784.1	P02652	7	69	0	APOA2_HUMAN	404448	273805	505150	422514
Alpha-1B-glycoprotein OS=Homo sapiens OX=9606 GN=A1BG PE=1 SV=4	5.48	54823.8	36035.4	P04217	23	75.76	0	A1BG_HUMAN	702286	748719	736236	765123
Hemoglobin subunit alpha OS=Homo sapiens OX=9606 GN=HBA1 PE=1 SV=2	9.18	15314.6	35567.1	P69905	8	88.73	0	HBA_HUMAN	347137	329319	439920	275883
Haptoglobin-related protein OS=Homo sapiens OX=9606 GN=HPR PE=2 SV=2	6.67	39542.9	21956.6	P00739	16	53.45	0	HPTR_HUMAN	17789.6	21057	19767.2	13480.2
Afamin OS=Homo sapiens OX=9606 GN=AFM PE=1 SV=1	5.54	71008.1	21725.4	P43652	42	69.62	0	AFAM_HUMAN	458471	482239	485303	506767
Leucine-rich alpha-2-glycoprotein OS=Homo sapiens OX=9606 GN=LRG1 PE=1 SV=2	6.5	38406.1	20518.5	P02750	18	79.25	0	A2GL_HUMAN	222510	290356	377897	347878
Cationic trypsin OS=Bos taurus OX=9913 PE=1 SV=3	8.01	26469.6	19958.3	P00760	12	82.52	0	TRY1_BOVIN	466840	492263	438600	433752
Alpha-1-acid glycoprotein 2 OS=Homo sapiens OX=9606 GN=ORM2 PE=1 SV=2	4.84	23887.8	18913.6	P19652	6	43.78	0	A1AG2_HUMAN	100200	96394	157832	136720
Alpha-2-HS-glycoprotein OS=Homo sapiens OX=9606 GN=AHSG PE=1 SV=2	5.33	40139.2	17311.3	P02765	16	60.22	0	FETUA_HUMAN	497323	533406	502211	551259
SPARC OS=Homo sapiens OX=9606 GN=SPARC PE=1 SV=1	4.54	35487.6	17167	P09486	15	65.02	0	SPRC_HUMAN	273748	406813	5559	2079.5
Transforming growth factor-beta-induced protein ig-h3 OS=Homo sapiens OX=9606 GN=TGFBI PE=1 SV=1	7.52	75308.3	15247.8	Q15582	36	77.45	0	BGH3_HUMAN	379290	411965	4619.33	1006.67
Plasminogen activator inhibitor 1 OS=Homo sapiens OX=9606 GN=SERPINE1 PE=1 SV=1	6.75	45117.1	14527.7	P05121	18	63.93	0	PAI1_HUMAN	230364	389439	9386.67	804
Hemoglobin subunit delta OS=Homo sapiens OX=9606 GN=HBD PE=1 SV=2	8.24	16169.6	14397.9	P02042	9	80.27	0	HBD_HUMAN	1951.47	75667.7	4054.59	3582.41
N-acetylmuramoyl-L-alanine amidase OS=Homo sapiens OX=9606 GN=PGLYRP2 PE=1 SV=1	7.27	62787.4	13724.7	Q96PD5	20	64.41	0	PGRP2_HUMAN	270186	282810	372959	346956
Fibronectin OS=Homo sapiens OX=9606 GN=FN1 PE=1 SV=5	5.17	275913	13372.2	P02751	93	62.09	0	FINC_HUMAN	430136	449880	5965	5412.33
Metalloproteinase inhibitor 1 OS=Homo sapiens OX=9606 GN=TIMP1 PE=1 SV=1	8.02	23855.2	12314.6	P01033	7	55.56	0	TIMP1_HUMAN	178386	160037	5023.5	1929.33
Beta-2-glycoprotein 1 OS=Homo sapiens OX=9606 GN=APOH PE=1 SV=3	7.87	39609.8	10866.6	P02749	14	82.9	0	APOH_HUMAN	185409	213827	248841	198443
Protein AMBP OS=Homo sapiens OX=9606 GN=AMBP PE=1 SV=1	5.87	39912	7490.96	P02760	9	40.06	0	AMBP_HUMAN	112234	127791	147076	126425
Hemoglobin subunit gamma-1 OS=Homo sapiens OX=9606 GN=HBG1 PE=1 SV=2	6.78	16197.5	7271.72	P69891	3	18.37	0	HBG1_HUMAN	11200.1	11196.6	2198.53
Kininogen-1 OS=Homo sapiens OX=9606 GN=KNG1 PE=1 SV=2	6.34	73041	5559.82	P01042	25	53.88	0	KNG1_HUMAN	158572	175797	195117	169887
Metalloproteinase inhibitor 2 OS=Homo sapiens OX=9606 GN=TIMP2 PE=1 SV=2	7.36	25083.6	5482.8	P16035	8	53.64	0	TIMP2_HUMAN	71419	68328
Retinol-binding protein 4 OS=Homo sapiens OX=9606 GN=RBP4 PE=1 SV=3	5.67	23352.2	5222.43	P02753	9	63.68	0	RET4_HUMAN	35099.7	40277.3	43423	45497
Serotransferrin OS=Homo sapiens OX=9606 GN=TF PE=1 SV=3	6.75	79345.1	5214.16	P02787	39	64.33	0	TRFE_HUMAN	72325	106002	110750	95940
Collagen alpha-1(VI) chain OS=Homo sapiens OX=9606 GN=COL6A1 PE=1 SV=3	5.09	109670	4137.23	P12109	30	42.32	0	CO6A1_HUMAN	139221	145246	117186	295811
Interstitial collagenase OS=Homo sapiens OX=9606 GN=MMP1 PE=1 SV=3	6.5	54178.1	4007.82	P03956	21	56.93	0	MMP1_HUMAN	57718.3	27254.7	22140.7	20165.3
Follistatin-related protein 1 OS=Homo sapiens OX=9606 GN=FSTL1 PE=1 SV=1	5.23	36126.1	3807.87	Q12841	14	56.17	0	FSTL1_HUMAN	121781	92263	1272	140490
Thyroxine-binding globulin OS=Homo sapiens OX=9606 GN=SERPINA7 PE=1 SV=2	5.85	46666.8	3466.29	P05543	15	45.54	0	THBG_HUMAN	53882	38871.3	65783.3	69261.3
Vitamin D-binding protein OS=Homo sapiens OX=9606 GN=GC PE=1 SV=2	5.16	54514.4	3106.46	P02774	19	72.57	0	VTDB_HUMAN	59534.7	59955.7	78254.3	52241
Complement C1r subcomponent-like protein OS=Homo sapiens OX=9606 GN=C1RL PE=1 SV=2	6.78	54239.8	2911.68	Q9NZP8	12	27.31	0	C1RL_HUMAN	88619.3	102210	113012	106298
Angiotensinogen OS=Homo sapiens OX=9606 GN=AGT PE=1 SV=1	5.85	53439.4	2643.23	P01019	13	53.2	0	ANGT_HUMAN	40408.7	40894.7	47909	54410.7
Apolipoprotein A-I OS=Homo sapiens OX=9606 GN=APOA1 PE=1 SV=1	5.43	30777.9	2434.65	P02647	13	55.06	0	APOA1_HUMAN	18827	22532.7	58622.3	20768
Actin, cytoplasmic 1 OS=Homo sapiens OX=9606 GN=ACTB PE=1 SV=1	5.14	42079	2170.09	P60709	15	60.8	0	ACTB_HUMAN	57434.7	54338	8362.87	12956.3
Collagen alpha-1(I) chain OS=Homo sapiens OX=9606 GN=COL1A1 PE=1 SV=5	5.46	139968	2157.72	P02452	22	31.63	0	CO1A1_HUMAN	152863	166332	5497	8101.5
Apolipoprotein M OS=Homo sapiens OX=9606 GN=APOM PE=1 SV=2	5.6	21595.5	2053.3	O95445	5	45.21	0	APOM_HUMAN	13077	16864	28258.3	26890
Clusterin OS=Homo sapiens OX=9606 GN=CLU PE=1 SV=1	5.84	53065	1980.01	P10909	11	37.86	0	CLUS_HUMAN	2222	33404.3	2344	2545
Sex hormone-binding globulin OS=Homo sapiens OX=9606 GN=SHBG PE=1 SV=2	6.24	44007.4	1916.68	P04278	12	52.99	0	SHBG_HUMAN	92176	37085.7	99868.7	100974
Alpha-1-acid glycoprotein 1 OS=Homo sapiens OX=9606 GN=ORM1 PE=1 SV=1	4.74	23739.7	1894.54	P02763	6	36.82	0	A1AG1_HUMAN	14102.9	15359.4	26405	11112.6
Galectin-1 OS=Homo sapiens OX=9606 GN=LGALS1 PE=1 SV=2	5.14	15057.9	1715.09	P09382	4	39.26	0	LEG1_HUMAN	15908.7	11032	650	1237
Insulin OS=Homo sapiens OX=9606 GN=INS PE=1 SV=1	5.05	12323.1	1638.04	P01308	2	26.36	0	INS_HUMAN	23997	123791	13010	17488
UDP-glucose 4-epimerase OS=Homo sapiens OX=9606 GN=GALE PE=1 SV=2	6.27	38680.9	1609.06	Q14376	3	18.1	0	GALE_HUMAN	91824	118233	132762
Carboxypeptidase N subunit 2 OS=Homo sapiens OX=9606 GN=CPN2 PE=1 SV=3	5.57	61412.1	1514.4	P22792	12	36.88	0	CPN2_HUMAN	20593	27258.3	34840.3	33558.3
Alpha-1-antitrypsin OS=Homo sapiens OX=9606 GN=SERPINA1 PE=1 SV=3	5.24	46907.7	1486.16	P01009	19	62.68	0	A1AT_HUMAN	53485.3	63462	49071.7	80777
Microfibril-associated glycoprotein 4 OS=Homo sapiens OX=9606 GN=MFAP4 PE=1 SV=2	5.24	28990.4	1307.33	P55083	3	12.94	0	MFAP4_HUMAN	24886.3	16238		7551
Monocyte differentiation antigen CD14 OS=Homo sapiens OX=9606 GN=CD14 PE=1 SV=2	5.8	40703.6	1288.21	P08571	9	48.27	0	CD14_HUMAN	20538.3	28995.3	32159	26419
Ceruloplasmin OS=Homo sapiens OX=9606 GN=CP PE=1 SV=1	5.34	123061	1213.79	P00450	25	46.1	0	CERU_HUMAN	28062.3	31342.7	38191.3	35089.3
Alpha-2-macroglobulin OS=Homo sapiens OX=9606 GN=A2M PE=1 SV=3	6	164717	1174.29	P01023	9	13.91	0	A2MG_HUMAN	9147.33	10055.3	102982	177460
POTE ankyrin domain family member F OS=Homo sapiens OX=9606 GN=POTEF PE=1 SV=2	5.77	123099	1145.15	A5A3E0	16	20.37	0	POTEF_HUMAN	2021.58	552.273	1469.96
Apolipoprotein D OS=Homo sapiens OX=9606 GN=APOD PE=1 SV=1	4.87	21560.7	1141.71	P05090	6	58.73	0	APOD_HUMAN	13621.7	16825	19533.3	18425.7
Glyceraldehyde-3-phosphate dehydrogenase OS=Homo sapiens OX=9606 GN=GAPDH PE=1 SV=3	8.7	36224.4	1104.38	P04406	7	39.7	0	G3P_HUMAN	26790.7	34814.3	3795	3859.67
Extracellular matrix protein 1 OS=Homo sapiens OX=9606 GN=ECM1 PE=1 SV=2	6.24	62270.9	973.826	Q16610	9	32.22	0	ECM1_HUMAN	23230.3
Collagen alpha-1(V) chain OS=Homo sapiens OX=9606 GN=COL5A1 PE=1 SV=3	4.75	184244	930.464	P20908	17	22.91	0	CO5A1_HUMAN	49027.3	76421.3	1361	2156
SPARC-like protein 1 OS=Homo sapiens OX=9606 GN=SPARCL1 PE=1 SV=2	4.53	76063.3	875.578	Q14515	3	5.27	0	SPRL1_HUMAN		4919.44	5630
Actin, gamma-enteric smooth muscle OS=Homo sapiens OX=9606 GN=ACTG2 PE=1 SV=1	5.16	42276.2	871.111	P63267	10	36.44	0	ACTH_HUMAN	28081.7	37031.7	13363
Collagen triple helix repeat-containing protein 1 OS=Homo sapiens OX=9606 GN=CTHRC1 PE=1 SV=1	7.94	26794.3	821.417	Q96CG8	4	24.69	0	CTHR1_HUMAN		23365.7
Immunoglobulin kappa constant OS=Homo sapiens OX=9606 GN=IGKC PE=1 SV=2	6.1	11936.1	804.298	P01834	2	31.78	0	IGKC_HUMAN	2375.5	2756.5	7249	8611
Cystatin-C OS=Homo sapiens OX=9606 GN=CST3 PE=1 SV=1	8.99	16027.4	770.57	P01034	3	52.05	0	CYTC_HUMAN	6511
POTE ankyrin domain family member J OS=Homo sapiens OX=9606 GN=POTEJ PE=3 SV=1	5.57	118816	745.092	P0CG39	13	24.66	0	POTEJ_HUMAN	38092.4	21084.4	18371.8	18544.7
Fetuin-B OS=Homo sapiens OX=9606 GN=FETUB PE=1 SV=2	6.47	42910.4	697.299	Q9UGM5	6	22.25	0	FETUB_HUMAN	14845.7	16584	22418.7	21055.3
Gremlin-1 OS=Homo sapiens OX=9606 GN=GREM1 PE=1 SV=1	9.74	21210	696.971	O60565	2	19.02	0	GREM1_HUMAN		11772.5
Antithrombin-III OS=Homo sapiens OX=9606 GN=SERPINC1 PE=1 SV=1	6.3	53058.8	690.786	P01008	10	42.67	0	ANT3_HUMAN	21378.7	26068.3	20384.3	18853.3
Complement C3 OS=Homo sapiens OX=9606 GN=C3 PE=1 SV=2	5.96	188688	676.021	P01024	14	13.23	0	CO3_HUMAN	2959.33	8674	44379.3	45502
Complement C1r subcomponent OS=Homo sapiens OX=9606 GN=C1R PE=1 SV=2	5.77	81658.4	668.654	P00736	2	15.04	0	C1R_HUMAN				2428.19
Beta-actin-like protein 2 OS=Homo sapiens OX=9606 GN=ACTBL2 PE=1 SV=2	5.25	42345.5	660.845	Q562R1	5	30.05	0	ACTBL_HUMAN	1533.76		2767.71
Attractin OS=Homo sapiens OX=9606 GN=ATRN PE=1 SV=2	7	163556	650.559	O75882	18	21.62	0	ATRN_HUMAN	18129.3	35214.3	52357.7	34449.7
Pregnancy zone protein OS=Homo sapiens OX=9606 GN=PZP PE=1 SV=4	5.93	165346	646.417	P20742	6	8.7	0	PZP_HUMAN			87508.6	1960.94
Nesprin-1 OS=Homo sapiens OX=9606 GN=SYNE1 PE=1 SV=4	5.23	1.01776e+06	624.737	Q8NF91	29	12.15	0	SYNE1_HUMAN	31568.7	28602.3	66615.3	31561
60 kDa SS-A/Ro ribonucleoprotein OS=Homo sapiens OX=9606 GN=RO60 PE=1 SV=2	7.96	61412.1	602.4	P10155	3	6.88	0	RO60_HUMAN	16853	16128.3	11041.5	9367
Cingulin-like protein 1 OS=Homo sapiens OX=9606 GN=CGNL1 PE=1 SV=2	5.37	149650	598.713	Q0VF96	3	4.84	0	CGNL1_HUMAN	3405	2468.67	2935.5	1932
Cilia- and flagella-associated protein 46 OS=Homo sapiens OX=9606 GN=CFAP46 PE=2 SV=3	6.99	306980	597.155	Q8IYW2	2	4.01	0	CFA46_HUMAN		1355.5
Plectin OS=Homo sapiens OX=9606 GN=PLEC PE=1 SV=3	5.63	533787	584.651	Q15149	20	11.21	0	PLEC_HUMAN	31805	15138.3	13069.7	20766.7
Microtubule cross-linking factor 1 OS=Homo sapiens OX=9606 GN=MTCL1 PE=1 SV=5	5.99	210781	578.11	Q9Y4B5	3	1.36	0	MTCL1_HUMAN	2723	10583	8002	5662
Keratin, type II cytoskeletal 2 epidermal OS=Homo sapiens OX=9606 GN=KRT2 PE=1 SV=2	8.05	65718.1	548.273	P35908	4	11.89	0	K22E_HUMAN	40796.3	14126.3	17514.3	21286.3
Collagen alpha-2(VI) chain OS=Homo sapiens OX=9606 GN=COL6A2 PE=1 SV=4	5.79	109777	547.562	P12110	8	13.05	0	CO6A2_HUMAN	21288.7	23641.3	23337	36030
Uncharacterized protein KIAA2026 OS=Homo sapiens OX=9606 GN=KIAA2026 PE=2 SV=2	9.32	230084	545.04	Q5HYC2	4	5.04	0	K2026_HUMAN	8256	12393	5170	8140
Nucleobindin-1 OS=Homo sapiens OX=9606 GN=NUCB1 PE=1 SV=4	4.98	53879.4	543.182	Q02818	9	35.79	0	NUCB1_HUMAN	14300.7	13987	1179	3018
Rootletin OS=Homo sapiens OX=9606 GN=CROCC PE=1 SV=1	5.28	228923	539.159	Q5TZA2	3	5.21	0	CROCC_HUMAN	12909.7		11905	23364
Phosphatidylcholine-sterol acyltransferase OS=Homo sapiens OX=9606 GN=LCAT PE=1 SV=1	5.66	49920.2	534.476	P04180	9	28.86	0	LCAT_HUMAN	10379.3	10719	13000.7	8433.33
Peroxidasin homolog OS=Homo sapiens OX=9606 GN=PXDN PE=1 SV=2	6.76	167898	526.243	Q92626	26	30.16	0	PXDN_HUMAN	29653	15686.7		9904
Dynein axonemal heavy chain 11 OS=Homo sapiens OX=9606 GN=DNAH11 PE=1 SV=4	6	524533	518.29	Q96DT5	12	10.32	0	DYH11_HUMAN	41902.7	11418	16874	19609.3
Alpha-2-antiplasmin OS=Homo sapiens OX=9606 GN=SERPINF2 PE=1 SV=3	5.84	54908	517.779	P08697	8	38.9	0	A2AP_HUMAN	22831	31147.7	37353	29658
Apolipoprotein C-III OS=Homo sapiens OX=9606 GN=APOC3 PE=1 SV=1	5.05	10852.3	500.729	P02656	2	23.23	0	APOC3_HUMAN	5609		3201	7379.5
ERC protein 2 OS=Homo sapiens OX=9606 GN=ERC2 PE=1 SV=3	6.52	110729	493.143	O15083	2	4.6	0	ERC2_HUMAN	220623	63719.5	104576	254111
Ryanodine receptor 3 OS=Homo sapiens OX=9606 GN=RYR3 PE=1 SV=3	5.35	558145	479.785	Q15413	6	13.16	0	RYR3_HUMAN	2742	13067	39254.3	56471
Collagen alpha-3(VI) chain OS=Homo sapiens OX=9606 GN=COL6A3 PE=1 SV=5	6.23	345381	438.466	P12111	41	21.09	0	CO6A3_HUMAN	60493	40428	48688.5	41353
Sulfhydryl oxidase 1 OS=Homo sapiens OX=9606 GN=QSOX1 PE=1 SV=3	9.07	83376.2	419.702	O00391	11	31.06	0	QSOX1_HUMAN	17851.3	16334.7	1102
Cingulin OS=Homo sapiens OX=9606 GN=CGN PE=1 SV=2	5.29	136614	417.561	Q9P2M7	4	8.44	0	CING_HUMAN	3189	5806.5	6061.5	9126
Carboxypeptidase O OS=Homo sapiens OX=9606 GN=CPO PE=1 SV=1	6.63	43042.8	416.008	Q8IVL8	2	7.22	0	CBPO_HUMAN	28325	18654	35306	35041
Vasorin OS=Homo sapiens OX=9606 GN=VASN PE=1 SV=1	7.09	72796.2	405.327	Q6EMK4	4	13.97	0	VASN_HUMAN	6279	8479.33	9502.67	7568.67
Microtubule-associated protein 1B OS=Homo sapiens OX=9606 GN=MAP1B PE=1 SV=2	4.54	271832	405.036	P46821	8	7.41	0	MAP1B_HUMAN	286230	211276	91705.5	325655
Calsyntenin-1 OS=Homo sapiens OX=9606 GN=CLSTN1 PE=1 SV=1	4.63	111047	399.813	O94985	11	20.18	0	CSTN1_HUMAN	13760	6642	7542.5	8100.5
Probable helicase senataxin OS=Homo sapiens OX=9606 GN=SETX PE=1 SV=4	6.77	307214	399.789	Q7Z333	4	3.96	0	SETX_HUMAN	3174	4146.33	4715	4757.33
Chromodomain-helicase-DNA-binding protein 5 OS=Homo sapiens OX=9606 GN=CHD5 PE=1 SV=1	5.74	224647	399.474	Q8TDI0	3	5.42	0	CHD5_HUMAN	10145.5	10184	13029	10450
Stromelysin-1 OS=Homo sapiens OX=9606 GN=MMP3 PE=1 SV=2	5.72	54262.5	396.369	P08254	7	20.75	0	MMP3_HUMAN	12527	1753	1211	862
Tetraspanin-14 OS=Homo sapiens OX=9606 GN=TSPAN14 PE=1 SV=1	6.44	31375.2	394.693	Q8NG11	2	7.04	0	TSN14_HUMAN	61791.5
DNA polymerase epsilon catalytic subunit A OS=Homo sapiens OX=9606 GN=POLE PE=1 SV=5	5.95	264199	393.045	Q07864	4	3.94	0	DPOE1_HUMAN	2090
Desmoplakin OS=Homo sapiens OX=9606 GN=DSP PE=1 SV=3	6.39	334227	390.292	P15924	4	4.74	0	DESP_HUMAN	1811.67	1227		1311
Microtubule-actin cross-linking factor 1, isoforms 1/2/3/5 OS=Homo sapiens OX=9606 GN=MACF1 PE=1 SV=4	5.11	843555	383.737	Q9UPN3	22	8.3	0	MACF1_HUMAN	12633.3	12126.3	9724	8028.33
Serine/threonine-protein kinase/endoribonuclease IRE2 OS=Homo sapiens OX=9606 GN=ERN2 PE=1 SV=4	6.75	103165	376.504	Q76MJ5	3	3.67	0	ERN2_HUMAN	1369
EGF-containing fibulin-like extracellular matrix protein 1 OS=Homo sapiens OX=9606 GN=EFEMP1 PE=1 SV=2	4.77	56921.7	375.014	Q12805	9	28.19	0	FBLN3_HUMAN	12998.7
Putative uncharacterized protein LINC02901 OS=Homo sapiens OX=9606 GN=LINC02901 PE=5 SV=1	8.14	23336.5	372.081	Q4VX62	4	36.14	0	CF099_HUMAN	16314	18028	35798.5	31373.5
Biotinidase OS=Homo sapiens OX=9606 GN=BTD PE=1 SV=2	5.79	62045.5	370.808	P43251	8	27.07	0	BTD_HUMAN	13762.7	15835.3	21493	15670.3
Keratin, type I cytoskeletal 10 OS=Homo sapiens OX=9606 GN=KRT10 PE=1 SV=6	4.96	59055.3	367.701	P13645	6	17.64	0	K1C10_HUMAN	17153	3247.33	2653	4338.67
Leucine-rich repeat serine/threonine-protein kinase 2 OS=Homo sapiens OX=9606 GN=LRRK2 PE=1 SV=2	6.34	289753	355.642	Q5S007	7	8.27	0	LRRK2_HUMAN	12649	31200	126492	130608
Alpha-enolase OS=Homo sapiens OX=9606 GN=ENO1 PE=1 SV=2	7.17	47511.2	353.07	P06733	4	10.14	0	ENOA_HUMAN	3767.67	6037.33	1489.67	1021
Dynein axonemal heavy chain 7 OS=Homo sapiens OX=9606 GN=DNAH7 PE=1 SV=2	5.61	464696	347.954	Q8WXX0	6	6.83	0	DYH7_HUMAN	11615	18714.5	20205	15763
Phospholipid-transporting ATPase VB OS=Homo sapiens OX=9606 GN=ATP10B PE=1 SV=2	6.44	167786	343.338	O94823	2	3.08	0	AT10B_HUMAN	2086
Serine--tRNA ligase, mitochondrial OS=Homo sapiens OX=9606 GN=SARS2 PE=1 SV=1	8.08	58738.9	342.128	Q9NP81	2	7.72	0	SYSM_HUMAN		3512.5
Splicing factor 3A subunit 3 OS=Homo sapiens OX=9606 GN=SF3A3 PE=1 SV=1	5.11	59191.2	341.531	Q12874	3	7.58	0	SF3A3_HUMAN	2232.33
CB1 cannabinoid receptor-interacting protein 1 OS=Homo sapiens OX=9606 GN=CNRIP1 PE=1 SV=1	8.18	18762.4	340.466	Q96F85	2	18.9	0	CNRP1_HUMAN			1079
Endothelial protein C receptor OS=Homo sapiens OX=9606 GN=PROCR PE=1 SV=1	6.78	27013.6	339.103	Q9UNN8	2	9.24	0	EPCR_HUMAN	5484	2843.5	6885	5859
Semaphorin-6A OS=Homo sapiens OX=9606 GN=SEMA6A PE=1 SV=2	8.36	115707	338.863	Q9H2E6	2	4.27	0	SEM6A_HUMAN	1340		1293	2075
Serine/threonine-protein kinase TAO2 OS=Homo sapiens OX=9606 GN=TAOK2 PE=1 SV=2	6.85	139050	338.827	Q9UL54	2	3.56	0	TAOK2_HUMAN		4305
Plexin-B2 OS=Homo sapiens OX=9606 GN=PLXNB2 PE=1 SV=3	5.8	207865	336.686	O15031	2	3.32	0	PLXB2_HUMAN	1474
Dynein axonemal heavy chain 5 OS=Homo sapiens OX=9606 GN=DNAH5 PE=1 SV=3	5.7	532843	316.447	Q8TE73	9	6.94	0	DYH5_HUMAN	88887.7	227381	105248	106238
Ryanodine receptor 1 OS=Homo sapiens OX=9606 GN=RYR1 PE=1 SV=3	5.01	570879	313.075	P21817	6	4.45	0	RYR1_HUMAN	1645	3351.5	2787.67	2228
Transcriptional repressor p66-alpha OS=Homo sapiens OX=9606 GN=GATAD2A PE=1 SV=1	10.39	68405.1	312.662	Q86YP4	3	12.01	0	P66A_HUMAN	840679	275082	723256	791440
Ryanodine receptor 2 OS=Homo sapiens OX=9606 GN=RYR2 PE=1 SV=3	5.66	569701	308.526	Q92736	3	3.26	0	RYR2_HUMAN	6816.33	7779.33	6918.33	9328.5
DNA-dependent protein kinase catalytic subunit OS=Homo sapiens OX=9606 GN=PRKDC PE=1 SV=3	6.71	474051	307.46	P78527	4	3.54	0	PRKDC_HUMAN	7837.5	6765.33	8325	7360
Glutaminyl-peptide cyclotransferase OS=Homo sapiens OX=9606 GN=QPCT PE=1 SV=1	6.13	40990.7	307.354	Q16769	5	30.19	0	QPCT_HUMAN		7612
Chaperone protein ClpB OS=Escherichia coli (strain K12) OX=83333 GN=clpB PE=1 SV=1	5.21	95756.3	299.506	P63284	6	12.25	0	CLPB_ECOLI	29961.3	28464.7	23373.3	29166.3
Fibrillin-1 OS=Homo sapiens OX=9606 GN=FBN1 PE=1 SV=4	4.62	332885	297.417	P35555	13	6.86	0	FBN1_HUMAN	55157.3
Pigment epithelium-derived factor OS=Homo sapiens OX=9606 GN=SERPINF1 PE=1 SV=4	5.94	46483.3	295.264	P36955	3	12.44	0	PEDF_HUMAN	6122.67
Alpha-actinin-1 OS=Homo sapiens OX=9606 GN=ACTN1 PE=1 SV=2	5.09	103628	285.795	P12814	3	5.72	0	ACTN1_HUMAN	6994	4276.33	1650	1677
Centromere-associated protein E OS=Homo sapiens OX=9606 GN=CENPE PE=1 SV=2	5.36	317784	284.512	Q02224	2	2.15	0	CENPE_HUMAN	872	1453.5	918
Structural maintenance of chromosomes protein 2 OS=Homo sapiens OX=9606 GN=SMC2 PE=1 SV=2	8.63	136170	278.29	O95347	2	6.02	0	SMC2_HUMAN		2580
Succinate dehydrogenase assembly factor 2, mitochondrial OS=Homo sapiens OX=9606 GN=SDHAF2 PE=1 SV=1	6.39	19656.5	277.292	Q9NX18	2	24.7	0	SDHF2_HUMAN	7964.5
1-phosphatidylinositol 4,5-bisphosphate phosphodiesterase beta-3 OS=Homo sapiens OX=9606 GN=PLCB3 PE=1 SV=2	5.56	139598	277.234	Q01970	3	9.64	0	PLCB3_HUMAN	5281	8475.67	9693
Spectrin beta chain, non-erythrocytic 5 OS=Homo sapiens OX=9606 GN=SPTBN5 PE=1 SV=2	6.19	419488	275.57	Q9NRC6	3	2.91	0	SPTN5_HUMAN		2574	4098	5588
Centlein OS=Homo sapiens OX=9606 GN=CNTLN PE=1 SV=6	8.24	162199	272.448	Q9NXG0	4	7.9	0	CNTLN_HUMAN	42314.7	80934	93095	151628
Dynein axonemal heavy chain 12 OS=Homo sapiens OX=9606 GN=DNAH12 PE=2 SV=2	5.77	360022	272.283	Q6ZR08	6	5.37	0	DYH12_HUMAN	95708.5	75570.7	155132	167934
Collagen alpha-1(III) chain OS=Homo sapiens OX=9606 GN=COL3A1 PE=1 SV=4	6.17	139819	269.436	P02461	9	9.75	0	CO3A1_HUMAN	33103.3	30055		1009
Collagen alpha-6(VI) chain OS=Homo sapiens OX=9606 GN=COL6A6 PE=1 SV=2	6.43	248828	266.657	A6NMZ7	4	5.92	0	CO6A6_HUMAN		10727.3
Spondin-2 OS=Homo sapiens OX=9606 GN=SPON2 PE=1 SV=3	5.2	36359.6	263.535	Q9BUD6	4	22.05	0	SPON2_HUMAN	3906.33	1392	2043
Collagen alpha-1(XI) chain OS=Homo sapiens OX=9606 GN=COL11A1 PE=1 SV=4	4.88	181692	263.526	P12107	5	8.47	0	COBA1_HUMAN	21478.7
E3 ubiquitin-protein ligase RNF213 OS=Homo sapiens OX=9606 GN=RNF213 PE=1 SV=3	6.03	598936	260.161	Q63HN8	4	2	0	RN213_HUMAN	261426	129675	378154	417547
E3 ubiquitin-protein ligase HERC2 OS=Homo sapiens OX=9606 GN=HERC2 PE=1 SV=2	5.83	533844	260.026	O95714	3	1.94	0	HERC2_HUMAN		1399.91
Alstrom syndrome protein 1 OS=Homo sapiens OX=9606 GN=ALMS1 PE=1 SV=4	5.83	463458	256.628	Q8TCU4	3	1.85	0	ALMS1_HUMAN	5098	5761	6874	14547.5
Tubulin gamma-1 chain OS=Homo sapiens OX=9606 GN=TUBG1 PE=1 SV=2	5.7	51512.2	251.651	P23258	2	20.18	0	TBG1_HUMAN	1536.5
Coiled-coil domain-containing protein 186 OS=Homo sapiens OX=9606 GN=CCDC186 PE=1 SV=2	5.87	104371	251.578	Q7Z3E2	3	7.46	0	CC186_HUMAN	4116.33	1995	3066	3014
Proteasome activator complex subunit 4 OS=Homo sapiens OX=9606 GN=PSME4 PE=1 SV=2	6.44	213672	249.204	Q14997	2	3.09	0	PSME4_HUMAN	5491	2945	4513	7097
Espin OS=Homo sapiens OX=9606 GN=ESPN PE=1 SV=1	6.47	92645.1	248.154	B1AK53	2	4.33	0	ESPN_HUMAN		1165
Xin actin-binding repeat-containing protein 2 OS=Homo sapiens OX=9606 GN=XIRP2 PE=1 SV=2	5.94	384125	246.576	A4UGR9	3	2.1	0	XIRP2_HUMAN	4541		9606	11165
Putative HERC2-like protein 3 OS=Homo sapiens OX=9606 GN=HERC2P3 PE=5 SV=2	6.44	130768	245.388	Q9BVR0	3	9.15	0	HRC23_HUMAN		670.087
Dynein axonemal heavy chain 2 OS=Homo sapiens OX=9606 GN=DNAH2 PE=1 SV=3	5.93	511121	241.819	Q9P225	4	1.97	0	DYH2_HUMAN	21945.5	20238	104895	36702
NFX1-type zinc finger-containing protein 1 OS=Homo sapiens OX=9606 GN=ZNFX1 PE=2 SV=2	6.94	225245	237.42	Q9P2E3	3	2.03	0	ZNFX1_HUMAN	49169	133060	119090	108794
Kinesin-like protein KIF1B OS=Homo sapiens OX=9606 GN=KIF1B PE=1 SV=5	5.28	205902	235.132	O60333	2	4.57	0	KIF1B_HUMAN		1221
Dynein axonemal heavy chain 9 OS=Homo sapiens OX=9606 GN=DNAH9 PE=1 SV=3	5.54	515927	234.479	Q9NYC9	3	2.65	0	DYH9_HUMAN		15105.7
Chromodomain-helicase-DNA-binding protein 9 OS=Homo sapiens OX=9606 GN=CHD9 PE=1 SV=2	6.55	328189	231.423	Q3L8U1	3	2.83	0	CHD9_HUMAN		1557.67
Centromere protein J OS=Homo sapiens OX=9606 GN=CENPJ PE=1 SV=2	6.18	154198	228.719	Q9HC77	2	5.08	0	CENPJ_HUMAN	11995.5
Cytoplasmic dynein 2 heavy chain 1 OS=Homo sapiens OX=9606 GN=DYNC2H1 PE=1 SV=4	6.09	496101	224.831	Q8NCM8	2	4.48	0	DYHC2_HUMAN	11961	8908	15535	12782
Centrosome-associated protein 350 OS=Homo sapiens OX=9606 GN=CEP350 PE=1 SV=1	5.9	352527	220.781	Q5VT06	2	2.79	0	CE350_HUMAN	8442.5
Chromodomain-helicase-DNA-binding protein 8 OS=Homo sapiens OX=9606 GN=CHD8 PE=1 SV=5	6.01	292344	210.995	Q9HCK8	2	1.67	0	CHD8_HUMAN		1468.5
CDK5 regulatory subunit-associated protein 2 OS=Homo sapiens OX=9606 GN=CDK5RAP2 PE=1 SV=5	5.29	216578	182.543	Q96SN8	4	2.22	0	CK5P2_HUMAN	64441.7	67805	98475	88429
